# Supplementary material
Source: MDPI journal article supplement (https://www.mdpi.com/2624-5647/4/3/20)
Supplement: s1 [file s1]

# Supplementary

|                      |     | N1a | N1b | N1c | N2a | N2b | N2c | Tumor Location                 |
|----------------------|-----|-----|-----|-----|-----|-----|-----|--------------------------------|
| Four cycles CAPOX    | T1  | 1   | 0   | 0   | 0   | 0   | 0   | R = 1; L = 0; T = 0; Rec = 0   |
|                      | T2  | 2   | 0   | 0   | 0   | 0   | 0   | R = 1; L = 1; T = 0; Rec = 0   |
|                      | T3  | 8   | 3   | 2   | 0   | 0   | 0   | R = 8; L = 5; T = 0; Rec = 0   |
| Eight Cycles CAPOX   | T2  | 0   | 0   | 0   | 0   | 1   | 0   | R = 1; L = 0; T = 0; Rec = 0   |
|                      | T3  | 0   | 0   | 0   | 2   | 1   | 0   | R = 1; L = 2; T = 0; Rec = 0   |
|                      | T4a | 2   | 0   | 0   | 1   | 0   | 0   | R = 3; L = 0; T = 0; Rec = 0   |
|                      | T4b | 3   | 0   | 0   | 0   | 0   | 0   | R = 1; L = 2; T = 0; Rec = 0   |
| Twelve cycles FOLFOX | T2  | 2   | 0   | 0   | 1   | 2   | 0   | R = 1 ; L = 3; T = 0; Rec = 1  |
|                      | T3  | 13  | 10  | 4   | 9   | 5   | 0   | R = 18; L = 18; T = 4; Rec = 1 |
|                      | T4a | 4   | 3   | 3   | 5   | 2   | 0   | R = 8; L = 6; T = 1; Rec = 2   |
|                      | T4b | 2   | 1   | 0   | 0   | 0   | 0   | R = 3; L = 0; T = 0; Rec = 0   |

**Figure S1.** Tumor Characteristics by Treatment Regime and Intended Number of Treatment Cycles.
